# Supplementary material for: The influence of microcapsules with a partially filled structure on the damping properties of an epoxy resin
Source: Royal Society of Chemistry journal article supplement (doi:10.1039/c8nj00498f), 2018-01-01
Supplement: c8nj00498f1.pdf [file c8nj00498f1.pdf]

## New Journal of Chemistry

### Electronic Supplementary Material

# The influence of microcapsule with a partially filled structure on the damping property of epoxy resin

*Xiaoyu Shi<sup>a</sup>, Yilong Song<sup>a</sup>, Zhenzhen Cai<sup>a</sup>, Xuesong Wang<sup>a</sup>, Danfeng Cao<sup>a</sup>, Qiuli Cheng<sup>a</sup>, Jiawei Zou<sup>a</sup>, Zuosen Shi<sup>a</sup> and Zhanchen Cui<sup>\*ab</sup>*

- a. State Key Laboratory of Supramolecular Structure and Materials, Jilin University, Changchun 130012, People's Republic of China.
- b. Department of Chemistry and Pharmacy, Zhuhai College of Jilin University, Zhuhai 519041, People's Republic of China

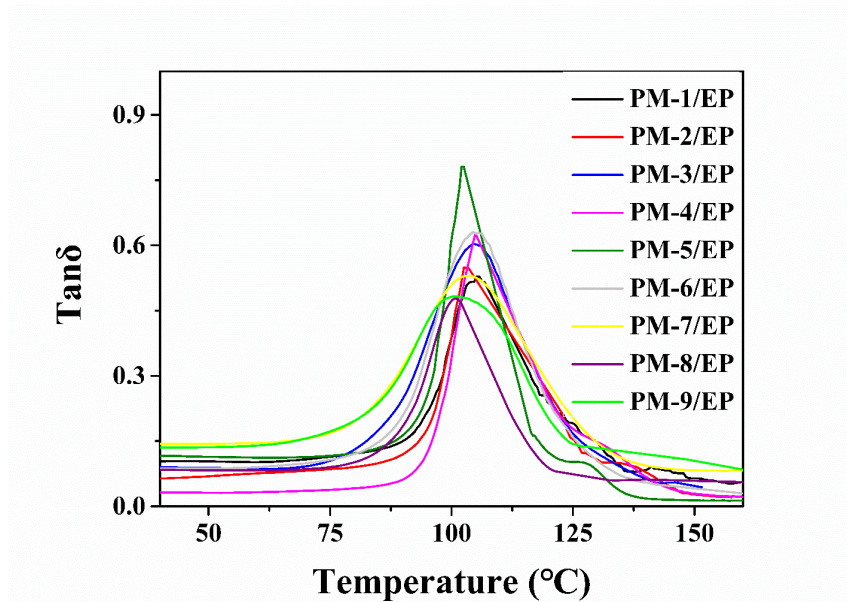

**Fig. S1** DMA curve of PM/EP blends (from PM-1 to PM-9)

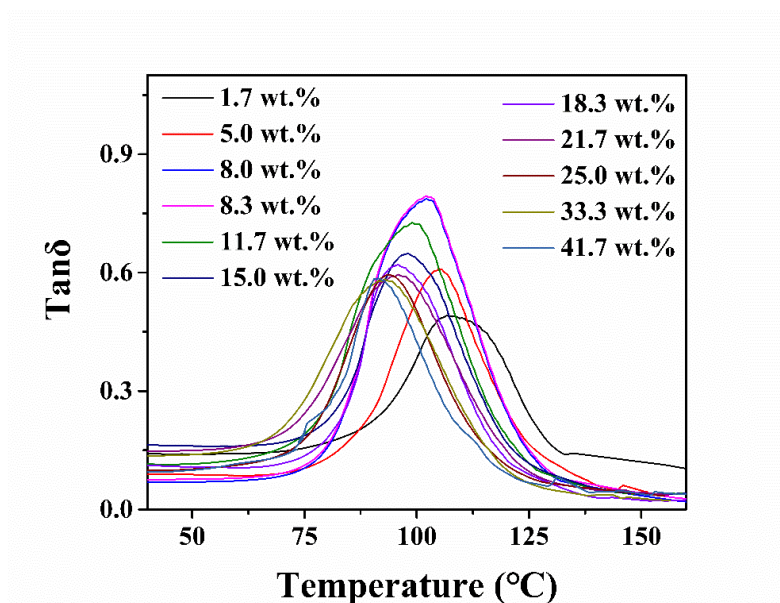

**Fig. S2** DMA curve of PM-5/EP blend with different microcapsule concentration

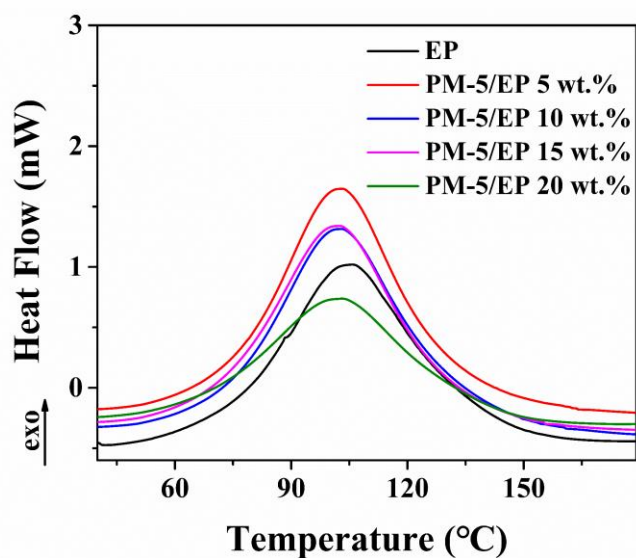

**Fig. S3** PM-5/EP DSC curves as a function of temperature with different PM-5 loading. EP mixed DETA with a mass ratio of 100:5.5.

**Table S1** the DSC result of PM-5/EP/DETA curing process (10 °C/min)

|                  | $T_i/^\circ\text{C}$ | $T_p/^\circ\text{C}$ | $T_f/^\circ\text{C}$ |
|------------------|----------------------|----------------------|----------------------|
| EP               | 72.23                | 103.77               | 140.82               |
| PM-5/EP 5 wt. %  | 71.42                | 103.20               | 133.55               |
| PM-5/EP 10 wt. % | 71.12                | 103.01               | 136.50               |
| PM-5/EP 15 wt. % | 69.19                | 102.52               | 134.17               |
| PM-5/EP 20 wt. % | 65.12                | 101.60               | 140.21               |

$T_i$ : the initial temperature,  $T_p$ : the peak temperature,  $T_f$ : the final temperature

According to Fig.S3 and Table S1,  $T_i$ ,  $T_p$  and  $T_f$  of PM-8/EP/DETA DSC result slightly decrease when the microcapsule concentration increases from 0 to 20 wt.%. This may be due to the amino-groups on the surface of microcapsules that react with epoxy group of epoxy resin and promote the crosslink process.

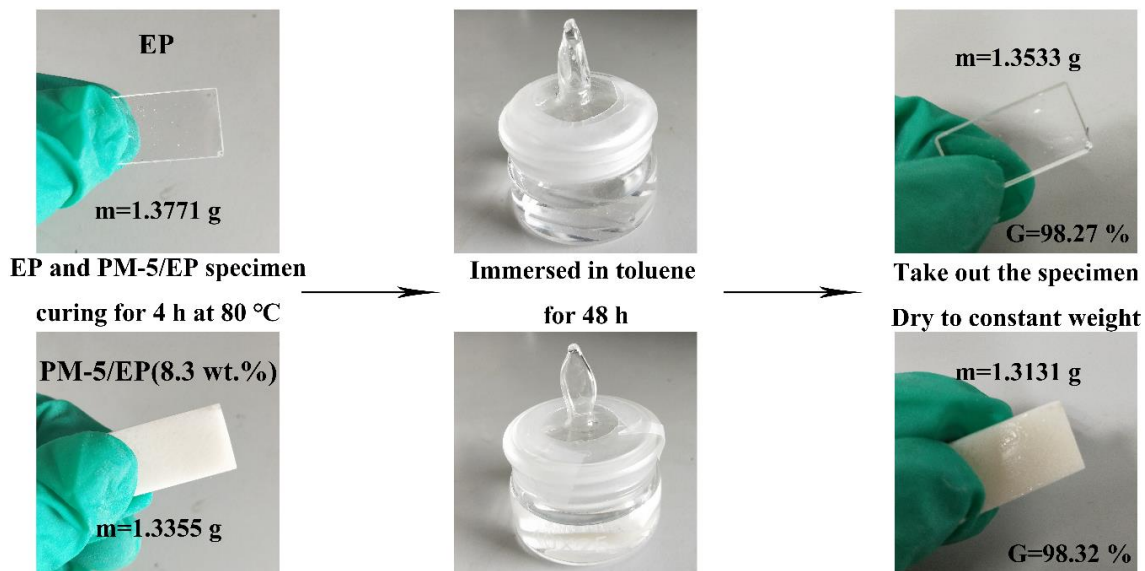

**Fig.S4** The comparative gel fraction experiment of EP and PM-5/EP (8.3 wt.%) after curing for 4 h at 80 °C. Two specimen had the similar gel fraction values. The result proves that microcapsules with a concentration of 8.3 wt. % hardly influence the reactivity of EP.
